# Supplementary material for: Hydrophobic dipeptide crystals: a promising Ag-free class of ultramicroporous materials showing argon/oxygen adsorption selectivity
Source: Royal Society of Chemistry journal article supplement (doi:10.1039/c4cp02085e), 2014-01-01
Supplement: c4cp02085e1.pdf [file c4cp02085e1.pdf]

Supporting Information for

**Hydrophobic dipeptide crystals: a promising  
Ag-free class of ultramicroporous materials  
showing argon/oxygen adsorption selectivity**

Rui Afonso<sup>†,‡</sup>, Adélio Mendes<sup>†</sup> and Luís Gales<sup>‡, §, \*</sup>

<sup>†</sup>LEPABE – Faculdade de Engenharia, Universidade do Porto, Rua Dr.

Roberto Frias, 4200-465 Porto, Portugal

<sup>‡</sup>IBMC—Institute for Molecular and Cell Biology, Rua do Campo Alegre 823,  
4150-180 Porto, Portugal.

<sup>§</sup>Instituto de Ciências Biomédicas Abel Salazar, Rua de Jorge Viterbo Ferreira  
228, 4050-313 Porto, Portugal

\* Corresponding author. Tel.

Email address: [lgales@ibmc.up.pt](mailto:lgales@ibmc.up.pt)

## Excess Adsorption Data

**Table S1.** Excess adsorption data of N<sub>2</sub>, O<sub>2</sub> and Ar, in VI, at 5 °C.

| N <sub>2</sub> |                          | O <sub>2</sub> |                          | Ar      |                          |
|----------------|--------------------------|----------------|--------------------------|---------|--------------------------|
| P / bar        | n / mol.kg <sup>-1</sup> | P / bar        | n / mol.kg <sup>-1</sup> | P / bar | n / mol.kg <sup>-1</sup> |
| 0              | 0                        | 0              | 0                        | 0       | 0                        |
| 0.16510        | 0.00476                  | 0.16925        | 0.00826                  | 0.17750 | 0.01137                  |
| 0.50695        | 0.01466                  | 0.46455        | 0.02286                  | 0.44705 | 0.02871                  |
| 0.81425        | 0.02355                  | 1.23095        | 0.05925                  | 0.90025 | 0.05664                  |
| 1.81380        | 0.05113                  | 2.27120        | 0.10578                  | 2.05805 | 0.12388                  |
| 3.09950        | 0.08570                  | 3.33520        | 0.14963                  | 3.19380 | 0.18329                  |
| 4.34980        | 0.11540                  | 4.40800        | 0.19088                  | 4.33810 | 0.23897                  |
| 5.71800        | 0.14616                  | 5.46010        | 0.23143                  | 5.48840 | 0.29021                  |

**Table S2.** Excess adsorption data of N<sub>2</sub>, O<sub>2</sub> and Ar, in IA, at 5 °C.

| N <sub>2</sub> |                          | O <sub>2</sub> |                          | Ar      |                          |
|----------------|--------------------------|----------------|--------------------------|---------|--------------------------|
| P / bar        | n / mol.kg <sup>-1</sup> | P / bar        | n / mol.kg <sup>-1</sup> | P / bar | n / mol.kg <sup>-1</sup> |
| 0              | 0                        | 0              | 0                        | 0       | 0                        |
| 0.16245        | 0.00614                  | 0.16600        | 0.01003                  | 0.16605 | 0.01128                  |
| 0.50025        | 0.01952                  | 0.46610        | 0.02895                  | 0.46815 | 0.03203                  |
| 0.81410        | 0.03222                  | 1.23460        | 0.07516                  | 1.23485 | 0.08207                  |
| 1.80980        | 0.06901                  | 2.26705        | 0.13299                  | 2.22630 | 0.14426                  |
| 3.12210        | 0.11622                  | 3.36080        | 0.19194                  | 3.34065 | 0.20948                  |
| 4.33470        | 0.15712                  | 4.40370        | 0.24282                  | 4.40005 | 0.26696                  |
| 5.69235        | 0.19790                  | 5.46590        | 0.29066                  | 5.46715 | 0.31900                  |

**Table S3.** Excess adsorption data of N<sub>2</sub>, O<sub>2</sub> and Ar, in IV, at 5 °C.

| N <sub>2</sub> |                          | O <sub>2</sub> |                          | Ar       |                          |
|----------------|--------------------------|----------------|--------------------------|----------|--------------------------|
| P / bar        | n / mol.kg <sup>-1</sup> | P / bar        | n / mol.kg <sup>-1</sup> | P / bar  | n / mol.kg <sup>-1</sup> |
| 0              | 0                        | 0              | 0                        | 0        | 0                        |
| 1.236575       | 0.06919                  | 1.197925       | 0.09949                  | 1.135380 | 0.10963                  |
| 2.711740       | 0.14335                  | 2.643270       | 0.20472                  | 2.467635 | 0.22065                  |
| 4.190250       | 0.21043                  | 3.252615       | 0.24481                  | 3.832200 | 0.31849                  |
|                |                          | 4.174085       | 0.30144                  |          |                          |

**Table S4.** Excess adsorption data of N<sub>2</sub>, O<sub>2</sub> and Ar, in VV, at 5 °C.

| N <sub>2</sub> |                          | O <sub>2</sub> |                          | Ar      |                          |
|----------------|--------------------------|----------------|--------------------------|---------|--------------------------|
| P / bar        | n / mol.kg <sup>-1</sup> | P / bar        | n / mol.kg <sup>-1</sup> | P / bar | n / mol.kg <sup>-1</sup> |
| 0              | 0                        | 0              | 0                        | 0       | 0                        |
| 0.16145        | 0.01148                  | 0.16065        | 0.01302                  | 0.16310 | 0.01570                  |
| 0.49685        | 0.03586                  | 0.46545        | 0.03840                  | 0.46485 | 0.04500                  |
| 0.81245        | 0.05777                  | 1.23520        | 0.09792                  | 1.23340 | 0.11329                  |
| 1.80800        | 0.12083                  | 2.26765        | 0.17165                  | 2.26650 | 0.19774                  |
| 3.09710        | 0.19549                  | 3.33775        | 0.24008                  | 3.33670 | 0.27517                  |
| 4.33860        | 0.25859                  | 4.39855        | 0.30255                  | 4.39670 | 0.34509                  |
| 5.69340        | 0.31898                  | 5.46215        | 0.36145                  | 5.46570 | 0.40821                  |

**Table S5.** Excess adsorption data of N<sub>2</sub>, O<sub>2</sub> and Ar, in VI, at 20 °C.

| N <sub>2</sub> |                          | O <sub>2</sub> |                          | Ar      |                          |
|----------------|--------------------------|----------------|--------------------------|---------|--------------------------|
| P / bar        | n / mol.kg <sup>-1</sup> | P / bar        | n / mol.kg <sup>-1</sup> | P / bar | n / mol.kg <sup>-1</sup> |
| 0              | 0                        | 0              | 0                        | 0       | 0                        |
| 0.16890        | 0.00355                  | 0.16390        | 0.00582                  | 0.17665 | 0.00827                  |
| 0.50090        | 0.01092                  | 0.46660        | 0.01697                  | 0.44650 | 0.02099                  |
| 0.81445        | 0.01768                  | 1.23150        | 0.04394                  | 0.89850 | 0.04148                  |
| 1.81030        | 0.03798                  | 2.27065        | 0.07929                  | 2.05580 | 0.09225                  |
| 3.09765        | 0.06466                  | 3.33550        | 0.11312                  | 3.19300 | 0.13822                  |
| 4.34370        | 0.08957                  | 4.40360        | 0.14567                  | 4.33940 | 0.18197                  |
| 5.71600        | 0.11539                  | 5.47050        | 0.17667                  | 5.48900 | 0.22311                  |

**Table S6.** Excess adsorption data of N<sub>2</sub>, O<sub>2</sub> and Ar, in IA, at 20 °C.

| N <sub>2</sub> |                          | O <sub>2</sub> |                          | Ar      |                          |
|----------------|--------------------------|----------------|--------------------------|---------|--------------------------|
| P / bar        | n / mol.kg <sup>-1</sup> | P / bar        | n / mol.kg <sup>-1</sup> | P / bar | n / mol.kg <sup>-1</sup> |
| 0              | 0                        | 0              | 0                        | 0       | 0                        |
| 0.16165        | 0.00421                  | 0.16665        | 0.00746                  | 0.16110 | 0.00831                  |
| 0.49715        | 0.01396                  | 0.46460        | 0.02108                  | 0.46420 | 0.02412                  |
| 0.81305        | 0.02309                  | 1.23210        | 0.05426                  | 1.23280 | 0.06176                  |
| 1.80660        | 0.05058                  | 2.26450        | 0.09757                  | 2.26550 | 0.11211                  |
| 3.09200        | 0.08680                  | 3.33500        | 0.14099                  | 3.33780 | 0.15957                  |
| 4.33740        | 0.11983                  | 4.40070        | 0.18234                  | 4.39780 | 0.20517                  |
| 5.70440        | 0.15311                  | 5.46595        | 0.22109                  | 5.46550 | 0.24957                  |

**Table S7.** Excess adsorption data of N<sub>2</sub>, O<sub>2</sub> and Ar, in IV, at 20 °C.

| N <sub>2</sub> |                          | O <sub>2</sub> |                          | Ar       |                          |
|----------------|--------------------------|----------------|--------------------------|----------|--------------------------|
| P / bar        | n / mol.kg <sup>-1</sup> | P / bar        | n / mol.kg <sup>-1</sup> | P / bar  | n / mol.kg <sup>-1</sup> |
| 0              | 0                        | 0              | 0                        | 0        | 0                        |
| 0.424140       | 0.01725                  | 1.215075       | 0.07165                  | 1.201995 | 0.08657                  |
| 1.718925       | 0.06768                  | 2.703170       | 0.15121                  | 2.647605 | 0.17930                  |
| 3.187710       | 0.12031                  | 4.172250       | 0.22220                  | 4.069070 | 0.26061                  |
| 4.853850       | 0.17511                  |                |                          |          |                          |

**Table S8.** Excess adsorption data of N<sub>2</sub>, O<sub>2</sub> and Ar, in VV, at 20 °C.

| N <sub>2</sub> |                          | O <sub>2</sub> |                          | Ar      |                          |
|----------------|--------------------------|----------------|--------------------------|---------|--------------------------|
| P / bar        | n / mol.kg <sup>-1</sup> | P / bar        | n / mol.kg <sup>-1</sup> | P / bar | n / mol.kg <sup>-1</sup> |
| 0              | 0                        | 0              | 0                        | 0       | 0                        |
| 0.1614         | 0.00856                  | 0.16115        | 0.01012                  | 0.16885 | 0.01271                  |
| 0.49665        | 0.02680                  | 0.4651         | 0.02925                  | 0.4648  | 0.03427                  |
| 0.81255        | 0.04335                  | 1.2329         | 0.07550                  | 1.231   | 0.08691                  |
| 1.8071         | 0.09341                  | 2.2667         | 0.13394                  | 2.2662  | 0.15428                  |
| 3.0914         | 0.15459                  | 3.3359         | 0.18966                  | 3.33575 | 0.21786                  |
| 4.3383         | 0.20794                  | 4.3988         | 0.24234                  | 4.3971  | 0.27694                  |
| 5.694          | 0.26029                  | 5.465          | 0.29092                  | 5.46545 | 0.33123                  |

**Table S9.** Excess adsorption data of N<sub>2</sub>, O<sub>2</sub> and Ar, in VI, at 35 °C.

| N <sub>2</sub> |                          | O <sub>2</sub> |                          | Ar      |                          |
|----------------|--------------------------|----------------|--------------------------|---------|--------------------------|
| P / bar        | n / mol.kg <sup>-1</sup> | P / bar        | n / mol.kg <sup>-1</sup> | P / bar | n / mol.kg <sup>-1</sup> |
| 0              | 0                        | 0              | 0                        | 0       | 0                        |
| 0.16630        | 0.00261                  | 0.16805        | 0.00459                  | 0.18690 | 0.00642                  |
| 0.50060        | 0.00836                  | 0.46650        | 0.01295                  | 0.44760 | 0.01547                  |
| 0.82100        | 0.01360                  | 1.23370        | 0.03348                  | 0.91385 | 0.03128                  |
| 1.80920        | 0.02971                  | 2.27040        | 0.06042                  | 2.05205 | 0.06914                  |
| 3.10940        | 0.05042                  | 3.33590        | 0.08677                  | 3.19230 | 0.10481                  |
| 4.34440        | 0.06953                  | 4.40630        | 0.11278                  | 4.33290 | 0.13917                  |
| 5.71700        | 0.08981                  | 5.47010        | 0.13742                  | 5.50225 | 0.17281                  |

**Table S10.** Excess adsorption data of N<sub>2</sub>, O<sub>2</sub> and Ar, in IA, at 35 °C.

| N <sub>2</sub> |                          | O <sub>2</sub> |                          | Ar      |                          |
|----------------|--------------------------|----------------|--------------------------|---------|--------------------------|
| P / bar        | n / mol.kg <sup>-1</sup> | P / bar        | n / mol.kg <sup>-1</sup> | P / bar | n / mol.kg <sup>-1</sup> |
| 0              | 0                        | 0              | 0                        | 0       | 0                        |
| 0.15825        | 0.00326                  | 0.16180        | 0.00520                  | 0.16410 | 0.00609                  |
| 0.49605        | 0.01102                  | 0.46520        | 0.01539                  | 0.46450 | 0.01768                  |
| 0.81370        | 0.01769                  | 1.23185        | 0.04032                  | 1.23030 | 0.04581                  |
| 1.80755        | 0.03859                  | 2.26570        | 0.07537                  | 2.26690 | 0.08306                  |
| 3.09395        | 0.06659                  | 3.36050        | 0.10815                  | 3.33720 | 0.11944                  |
| 4.33670        | 0.09175                  | 4.40550        | 0.14118                  | 4.39845 | 0.15514                  |
| 5.70400        | 0.11815                  | 5.47560        | 0.17227                  | 5.46555 | 0.18869                  |

**Table S11.** Excess adsorption data of N<sub>2</sub>, O<sub>2</sub> and Ar, in IV, at 35 °C.

| N <sub>2</sub> |                          | O <sub>2</sub> |                          | Ar       |                          |
|----------------|--------------------------|----------------|--------------------------|----------|--------------------------|
| P / bar        | n / mol.kg <sup>-1</sup> | P / bar        | n / mol.kg <sup>-1</sup> | P / bar  | n / mol.kg <sup>-1</sup> |
| 0              | 0                        | 0              | 0                        | 0        | 0                        |
| 1.255430       | 0.03623                  | 1.232690       | 0.05261                  | 1.216250 | 0.06667                  |
| 2.721895       | 0.07620                  | 2.685640       | 0.11030                  | 2.590125 | 0.13595                  |
| 4.191800       | 0.11404                  | 4.182265       | 0.16527                  | 3.987230 | 0.20072                  |

**Table S12.** Excess adsorption data of N<sub>2</sub>, O<sub>2</sub> and Ar, in VV, at 35 °C.

| N <sub>2</sub> |                          | O <sub>2</sub> |                          | Ar      |                          |
|----------------|--------------------------|----------------|--------------------------|---------|--------------------------|
| P / bar        | n / mol.kg <sup>-1</sup> | P / bar        | n / mol.kg <sup>-1</sup> | P / bar | n / mol.kg <sup>-1</sup> |
| 0              | 0                        | 0              | 0                        | 0       | 0                        |
| 0.16195        | 0.00621                  | 0.16320        | 0.00758                  | 0.16740 | 0.00966                  |
| 0.49630        | 0.02076                  | 0.46430        | 0.02204                  | 0.46480 | 0.02646                  |
| 0.81360        | 0.03312                  | 1.23310        | 0.05707                  | 1.23695 | 0.06733                  |
| 1.80240        | 0.07087                  | 2.26660        | 0.10258                  | 2.26580 | 0.11930                  |
| 3.09090        | 0.11812                  | 3.33460        | 0.14575                  | 3.33880 | 0.16919                  |
| 4.33865        | 0.16049                  | 4.39810        | 0.18755                  | 4.39560 | 0.21625                  |
| 5.69555        | 0.20298                  | 5.46360        | 0.22726                  | 5.46300 | 0.26023                  |

## Absolute adsorption results

Absolute adsorption was calculated like the excess adsorption, except for the substitution of real density for apparent density in the calculation. Apparent density calculated from the experimentally determined real density and the crystallographic porosity [1].

**Table S13.** Absolute adsorption results of N<sub>2</sub>, O<sub>2</sub> and Ar, in VI, at 5 °C.

| N <sub>2</sub> |                          | O <sub>2</sub> |                          | Ar      |                          |
|----------------|--------------------------|----------------|--------------------------|---------|--------------------------|
| P / bar        | n / mol.kg <sup>-1</sup> | P / bar        | n / mol.kg <sup>-1</sup> | P / bar | n / mol.kg <sup>-1</sup> |
| 0              | 0                        | 0              | 0                        | 0       | 0                        |
| 0.16510        | 0.00506                  | 0.16925        | 0.00857                  | 0.17750 | 0.01169                  |
| 0.50695        | 0.01558                  | 0.46455        | 0.023702                 | 0.44705 | 0.02952                  |
| 0.81425        | 0.02503                  | 1.23095        | 0.06149                  | 0.90025 | 0.05829                  |
| 1.81380        | 0.05444                  | 2.27120        | 0.10993                  | 2.05805 | 0.12764                  |
| 3.09950        | 0.09136                  | 3.33520        | 0.15574                  | 3.19380 | 0.18913                  |
| 4.34980        | 0.12335                  | 4.40800        | 0.19896                  | 4.33810 | 0.24692                  |
| 5.71800        | 0.15663                  | 5.46010        | 0.24145                  | 5.48840 | 0.30028                  |

**Table S14.** Absolute adsorption results of N<sub>2</sub>, O<sub>2</sub> and Ar, in IA, at 5 °C.

| N <sub>2</sub> |                          | O <sub>2</sub> |                          | Ar      |                          |
|----------------|--------------------------|----------------|--------------------------|---------|--------------------------|
| P / bar        | n / mol.kg <sup>-1</sup> | P / bar        | n / mol.kg <sup>-1</sup> | P / bar | n / mol.kg <sup>-1</sup> |
| 0              | 0                        | 0              | 0                        | 0       | 0                        |
| 0.16245        | 0.00644                  | 0.16600        | 0.01033                  | 0.16605 | 0.01158                  |
| 0.50025        | 0.02043                  | 0.46610        | 0.02980                  | 0.46815 | 0.03288                  |
| 0.81410        | 0.03370                  | 1.23460        | 0.07741                  | 1.23485 | 0.08432                  |
| 1.80980        | 0.07230                  | 2.26705        | 0.13712                  | 2.22630 | 0.14832                  |
| 3.12210        | 0.12191                  | 3.36080        | 0.19808                  | 3.34065 | 0.21558                  |
| 4.33470        | 0.16502                  | 4.40370        | 0.25086                  | 4.40005 | 0.27500                  |
| 5.69235        | 0.20828                  | 5.46590        | 0.30066                  | 5.46715 | 0.32900                  |



**Table S15.** Absolute adsorption results of N<sub>2</sub>, O<sub>2</sub> and Ar, in IV, at 5 °C.

| N <sub>2</sub> |                          | O <sub>2</sub> |                          | Ar       |                          |
|----------------|--------------------------|----------------|--------------------------|----------|--------------------------|
| P / bar        | n / mol.kg <sup>-1</sup> | P / bar        | n / mol.kg <sup>-1</sup> | P / bar  | n / mol.kg <sup>-1</sup> |
| 0              | 0                        | 0              | 0                        | 0        | 0                        |
| 1.236575       | 0.07218                  | 1.197925       | 0.10239                  | 1.135380 | 0.11223                  |
| 2.711740       | 0.14991                  | 2.643270       | 0.21112                  | 2.467635 | 0.22631                  |
| 4.190250       | 0.22058                  | 3.252615       | 0.25269                  | 3.832200 | 0.32731                  |
|                |                          | 4.174085       | 0.31156                  |          |                          |

**Table S16.** Absolute adsorption results of N<sub>2</sub>, O<sub>2</sub> and Ar, in VV, at 5 °C.

| N <sub>2</sub> |                          | O <sub>2</sub> |                          | Ar      |                          |
|----------------|--------------------------|----------------|--------------------------|---------|--------------------------|
| P / bar        | n / mol.kg <sup>-1</sup> | P / bar        | n / mol.kg <sup>-1</sup> | P / bar | n / mol.kg <sup>-1</sup> |
| 0              | 0                        | 0              | 0                        | 0       | 0                        |
| 0.16140        | 0.01196                  | 0.16065        | 0.01349                  | 0.16310 | 0.01618                  |
| 0.49685        | 0.03733                  | 0.46545        | 0.03978                  | 0.46485 | 0.04638                  |
| 0.81245        | 0.06017                  | 1.23520        | 0.10157                  | 1.23340 | 0.11694                  |
| 1.80800        | 0.12618                  | 2.26765        | 0.17837                  | 2.26650 | 0.20446                  |
| 3.09710        | 0.20467                  | 3.33775        | 0.24999                  | 3.33670 | 0.28507                  |
| 4.33860        | 0.27146                  | 4.39855        | 0.31563                  | 4.39670 | 0.35816                  |
| 5.69340        | 0.33588                  | 5.46215        | 0.37771                  | 5.46570 | 0.42447                  |

**Table S17.** Absolute adsorption results of N<sub>2</sub>, O<sub>2</sub> and Ar, in VI, at 20 °C.

| N <sub>2</sub> |                          | O <sub>2</sub> |                          | Ar      |                          |
|----------------|--------------------------|----------------|--------------------------|---------|--------------------------|
| P / bar        | n / mol.kg <sup>-1</sup> | P / bar        | n / mol.kg <sup>-1</sup> | P / bar | n / mol.kg <sup>-1</sup> |
| 0              | 0                        | 0              | 0                        | 0       | 0                        |
| 0.16890        | 0.00384                  | 0.16390        | 0.00610                  | 0.17665 | 0.00857                  |
| 0.50090        | 0.01178                  | 0.46660        | 0.01778                  | 0.44650 | 0.02176                  |
| 0.81445        | 0.01909                  | 1.23150        | 0.04607                  | 0.89850 | 0.04304                  |
| 1.81030        | 0.04111                  | 2.27065        | 0.08322                  | 2.05580 | 0.09581                  |
| 3.09765        | 0.07003                  | 3.33550        | 0.11890                  | 3.19300 | 0.14376                  |
| 4.34370        | 0.09710                  | 4.40360        | 0.15332                  | 4.33940 | 0.18951                  |
| 5.71600        | 0.12531                  | 5.47050        | 0.18618                  | 5.48900 | 0.23266                  |

**Table S18.** Absolute adsorption results of N<sub>2</sub>, O<sub>2</sub> and Ar, in IA, at 20 °C.

| N <sub>2</sub> |                          | O <sub>2</sub> |                          | Ar      |                          |
|----------------|--------------------------|----------------|--------------------------|---------|--------------------------|
| P / bar        | n / mol.kg <sup>-1</sup> | P / bar        | n / mol.kg <sup>-1</sup> | P / bar | n / mol.kg <sup>-1</sup> |
| 0              | 0                        | 0              | 0                        | 0       | 0                        |
| 0.16165        | 0.00449                  | 0.16665        | 0.00775                  | 0.16110 | 0.00859                  |
| 0.49715        | 0.01481                  | 0.46460        | 0.02188                  | 0.46420 | 0.02492                  |
| 0.81305        | 0.02449                  | 1.23210        | 0.05638                  | 1.23280 | 0.06389                  |
| 1.80660        | 0.05370                  | 2.26450        | 0.10148                  | 2.26550 | 0.11602                  |
| 3.09200        | 0.09214                  | 3.33500        | 0.14676                  | 3.33780 | 0.16535                  |
| 4.33740        | 0.12732                  | 4.40070        | 0.18996                  | 4.39780 | 0.21279                  |
| 5.70440        | 0.16298                  | 5.46595        | 0.23056                  | 5.46550 | 0.25905                  |

**Table S19.** Absolute adsorption results of N<sub>2</sub>, O<sub>2</sub> and Ar, in IV, at 20 °C.

| N <sub>2</sub> |                          | O <sub>2</sub> |                          | Ar       |                          |
|----------------|--------------------------|----------------|--------------------------|----------|--------------------------|
| P / bar        | n / mol.kg <sup>-1</sup> | P / bar        | n / mol.kg <sup>-1</sup> | P / bar  | n / mol.kg <sup>-1</sup> |
| 0              | 0                        | 0              | 0                        | 0        | 0                        |
| 0.424140       | 0.01823                  | 1.215075       | 0.07443                  | 1.201995 | 0.08932                  |
| 1.718925       | 0.07162                  | 2.703170       | 0.15742                  | 2.647605 | 0.18538                  |
| 3.187710       | 0.12761                  | 4.172250       | 0.23180                  | 4.069070 | 0.26996                  |
| 4.853850       | 0.18625                  |                |                          |          |                          |

**Table S20.** Absolute adsorption results of N<sub>2</sub>, O<sub>2</sub> and Ar, in VV, at 20 °C.

| N <sub>2</sub> |                          | O <sub>2</sub> |                          | Ar      |                          |
|----------------|--------------------------|----------------|--------------------------|---------|--------------------------|
| P / bar        | n / mol.kg <sup>-1</sup> | P / bar        | n / mol.kg <sup>-1</sup> | P / bar | n / mol.kg <sup>-1</sup> |
| 0              | 0                        | 0              | 0                        | 0       | 0                        |
| 0.16140        | 0.00894                  | 0.16115        | 0.01050                  | 0.16885 | 0.01310                  |
| 0.49665        | 0.02796                  | 0.46510        | 0.03034                  | 0.46480 | 0.03536                  |
| 0.81255        | 0.04525                  | 1.23290        | 0.07839                  | 1.23100 | 0.08980                  |
| 1.80710        | 0.09765                  | 2.26670        | 0.13926                  | 2.26620 | 0.15960                  |
| 3.09140        | 0.16185                  | 3.33590        | 0.19750                  | 3.33575 | 0.22570                  |
| 4.33830        | 0.21813                  | 4.39880        | 0.25269                  | 4.39710 | 0.28729                  |
| 5.69400        | 0.27367                  | 5.46500        | 0.30379                  | 5.46545 | 0.34411                  |

**Table S21.** Absolute adsorption results of N<sub>2</sub>, O<sub>2</sub> and Ar, in VI, at 35 °C.

| N <sub>2</sub> |                          | O <sub>2</sub> |                          | Ar      |                          |
|----------------|--------------------------|----------------|--------------------------|---------|--------------------------|
| P / bar        | n / mol.kg <sup>-1</sup> | P / bar        | n / mol.kg <sup>-1</sup> | P / bar | n / mol.kg <sup>-1</sup> |
| 0              | 0                        | 0              | 0                        | 0       | 0                        |
| 0.16630        | 0.00288                  | 0.16805        | 0.00486                  | 0.18690 | 0.00672                  |
| 0.50060        | 0.00918                  | 0.46650        | 0.01372                  | 0.44760 | 0.01620                  |
| 0.82100        | 0.01495                  | 1.23370        | 0.03551                  | 0.91385 | 0.03278                  |
| 1.80920        | 0.03268                  | 2.27040        | 0.06416                  | 2.05205 | 0.07252                  |
| 3.10940        | 0.05554                  | 3.33590        | 0.09227                  | 3.19230 | 0.11008                  |
| 4.34440        | 0.07669                  | 4.40630        | 0.12006                  | 4.33290 | 0.14632                  |
| 5.71700        | 0.09924                  | 5.47010        | 0.14646                  | 5.50225 | 0.18190                  |

**Table S22.** Absolute adsorption results of N<sub>2</sub>, O<sub>2</sub> and Ar, in IA, at 35 °C.

| N <sub>2</sub> |                          | O <sub>2</sub> |                          | Ar      |                          |
|----------------|--------------------------|----------------|--------------------------|---------|--------------------------|
| P / bar        | n / mol.kg <sup>-1</sup> | P / bar        | n / mol.kg <sup>-1</sup> | P / bar | n / mol.kg <sup>-1</sup> |
| 0              | 0                        | 0              | 0                        | 0       | 0                        |
| 0.15825        | 0.00352                  | 0.16180        | 0.00546                  | 0.16410 | 0.00636                  |
| 0.49605        | 0.01227                  | 0.46520        | 0.01615                  | 0.46450 | 0.01844                  |
| 0.81370        | 0.01983                  | 1.23185        | 0.04234                  | 1.23030 | 0.04782                  |
| 1.80755        | 0.04362                  | 2.26570        | 0.07909                  | 2.26690 | 0.08679                  |
| 3.09395        | 0.07544                  | 3.36050        | 0.11368                  | 3.33720 | 0.12493                  |
| 4.33670        | 0.10419                  | 4.40550        | 0.14843                  | 4.39845 | 0.16238                  |
| 5.70400        | 0.13451                  | 5.47560        | 0.18129                  | 5.46555 | 0.19770                  |

**Table S23.** Absolute adsorption results of N<sub>2</sub>, O<sub>2</sub> and Ar, in IV, at 35 °C.

| N <sub>2</sub> |                          | O <sub>2</sub> |                          | Ar       |                          |
|----------------|--------------------------|----------------|--------------------------|----------|--------------------------|
| P / bar        | n / mol.kg <sup>-1</sup> | P / bar        | n / mol.kg <sup>-1</sup> | P / bar  | n / mol.kg <sup>-1</sup> |
| 0              | 0                        | 0              | 0                        | 0        | 0                        |
| 1.255430       | 0.03897                  | 1.232690       | 0.05530                  | 1.216250 | 0.06946                  |
| 2.721895       | 0.08213                  | 2.685640       | 0.11617                  | 2.590125 | 0.14189                  |
| 4.191800       | 0.12318                  | 4.182265       | 0.17441                  | 3.987230 | 0.20988                  |

**Table S24.** Absolute adsorption results of N<sub>2</sub>, O<sub>2</sub> and Ar, in VV, at 35 °C.

| N <sub>2</sub> |                          | O <sub>2</sub> |                          | Ar      |                          |
|----------------|--------------------------|----------------|--------------------------|---------|--------------------------|
| P / bar        | n / mol.kg <sup>-1</sup> | P / bar        | n / mol.kg <sup>-1</sup> | P / bar | n / mol.kg <sup>-1</sup> |
| 0              | 0                        | 0              | 0                        | 0       | 0                        |
| 0.16195        | 0.00665                  | 0.16320        | 0.00801                  | 0.16740 | 0.01010                  |
| 0.49630        | 0.02209                  | 0.46430        | 0.02328                  | 0.46480 | 0.02771                  |
| 0.81360        | 0.03529                  | 1.23310        | 0.06037                  | 1.23695 | 0.07063                  |
| 1.80240        | 0.07569                  | 2.26660        | 0.10865                  | 2.26580 | 0.12536                  |
| 3.09090        | 0.12638                  | 3.33460        | 0.15468                  | 3.33880 | 0.17813                  |
| 4.33865        | 0.17209                  | 4.39810        | 0.19933                  | 4.39560 | 0.22802                  |
| 5.69555        | 0.21821                  | 5.46360        | 0.24191                  | 5.46300 | 0.27488                  |

## Fitting results

**Table S25.** Fitting parameters determined for N<sub>2</sub>, in VI, IA, IV and VV, at 5 °C, 20 °C and 35 °C.

|    | n <sub>max</sub> / mol.kg <sup>-1</sup> | b / bar <sup>-1</sup> |           |           |
|----|-----------------------------------------|-----------------------|-----------|-----------|
|    |                                         | 5 °C                  | 20 °C     | 35 °C     |
| VI | 2.54736                                 | 0.012297              | 0.0094729 | 0.0073619 |
| IA | 3.36315                                 | 0.012455              | 0.0093799 | 0.0075898 |
| IV | 2.99153                                 | 0.020315              | 0.014409  | 0.010501  |
| VV | 2.92024                                 | 0.026118              | 0.020331  | 0.015339  |

**Table S26.** Minimised sum of the squares for N<sub>2</sub>, in VI, IA, IV and VV, at 5 °C, 20 °C and 35 °C.

|       | VI                       | IA                       | IV                       | VV                       |
|-------|--------------------------|--------------------------|--------------------------|--------------------------|
| 5 °C  | 1.734 X 10 <sup>-6</sup> | 2.389 X 10 <sup>-6</sup> | 7.575 X 10 <sup>-6</sup> | 3.146 X 10 <sup>-6</sup> |
| 20 °C | 2.334 X 10 <sup>-6</sup> | 4.079 X 10 <sup>-6</sup> | 9.196 X 10 <sup>-6</sup> | 4.795 X 10 <sup>-6</sup> |
| 35 °C | 4.129 X 10 <sup>-7</sup> | 2.727 X 10 <sup>-6</sup> | 5.995 X 10 <sup>-6</sup> | 1.421 X 10 <sup>-6</sup> |
| Total | 4.481 X 10 <sup>-6</sup> | 9.195 X 10 <sup>-6</sup> | 2.277 X 10 <sup>-5</sup> | 9.363 X 10 <sup>-6</sup> |

**Table S27.** Fitting parameters determined for O<sub>2</sub>, in VI, IA, IV and VV, at 5 °C, 20 °C and 35 °C.

|    | n <sub>max</sub> / mol.kg <sup>-1</sup> | b / bar <sup>-1</sup> |          |           |
|----|-----------------------------------------|-----------------------|----------|-----------|
|    |                                         | 5 °C                  | 20 °C    | 35 °C     |
| VI | 3.18554                                 | 0.016245              | 0.012081 | 0.0092383 |
| IA | 3.91143                                 | 0.016633              | 0.012179 | 0.0092791 |
| IV | 3.36954                                 | 0.026821              | 0.018863 | 0.013610  |
| VV | 3.61289                                 | 0.024010              | 0.018580 | 0.014082  |

**Table S28.** Minimised sum of the squares for O<sub>2</sub>, in VI, IA, IV and VV, at 5 °C, 20 °C and 35 °C.

|       | VI                       | IA                       | IV                       | VV                       |
|-------|--------------------------|--------------------------|--------------------------|--------------------------|
| 5 °C  | 1.806 X 10 <sup>-6</sup> | 3.162 X 10 <sup>-6</sup> | 5.385 X 10 <sup>-6</sup> | 1.419 X 10 <sup>-6</sup> |
| 20 °C | 1.708 X 10 <sup>-7</sup> | 1.375 X 10 <sup>-6</sup> | 6.597 X 10 <sup>-6</sup> | 4.908 X 10 <sup>-7</sup> |
| 35 °C | 8.774 X 10 <sup>-8</sup> | 4.524 X 10 <sup>-6</sup> | 6.073 X 10 <sup>-6</sup> | 7.004 X 10 <sup>-7</sup> |
| Total | 2.065 X 10 <sup>-6</sup> | 9.060 X 10 <sup>-6</sup> | 1.805 X 10 <sup>-5</sup> | 2.610 X 10 <sup>-6</sup> |

**Table S29.** Fitting parameters determined for Ar, in VI, IA, IV and VV, at 5 °C, 20 °C and 35 °C.

|    | n <sub>max</sub> / mol.kg <sup>-1</sup> | b / bar <sup>-1</sup> |          |           |
|----|-----------------------------------------|-----------------------|----------|-----------|
|    |                                         | 5 °C                  | 20 °C    | 35 °C     |
| VI | 3.17554                                 | 0.021140              | 0.015584 | 0.011701  |
| IA | 4.04617                                 | 0.017754              | 0.013366 | 0.0098906 |
| IV | 3.31336                                 | 0.031719              | 0.023587 | 0.017922  |
| VV | 3.52994                                 | 0.028729              | 0.022153 | 0.016819  |

**Table S30.** Minimised sum of the squares for Ar, in VI, IA, IV and VV, at 5 °C, 20 °C and 35 °C.

|       | VI                       | IA                       | IV                       | VV                       |
|-------|--------------------------|--------------------------|--------------------------|--------------------------|
| 5 °C  | 4.353 X 10 <sup>-7</sup> | 3.145 X 10 <sup>-6</sup> | 5.820 X 10 <sup>-6</sup> | 1.331 X 10 <sup>-6</sup> |
| 20 °C | 1.451 X 10 <sup>-6</sup> | 1.413 X 10 <sup>-6</sup> | 6.493 X 10 <sup>-6</sup> | 2.427 X 10 <sup>-6</sup> |
| 35 °C | 1.363 X 10 <sup>-6</sup> | 3.735 X 10 <sup>-7</sup> | 6.373 X 10 <sup>-6</sup> | 5.604 X 10 <sup>-7</sup> |
| Total | 3.250 X 10 <sup>-6</sup> | 4.931 X 10 <sup>-6</sup> | 1.869 X 10 <sup>-5</sup> | 4.318 X 10 <sup>-6</sup> |

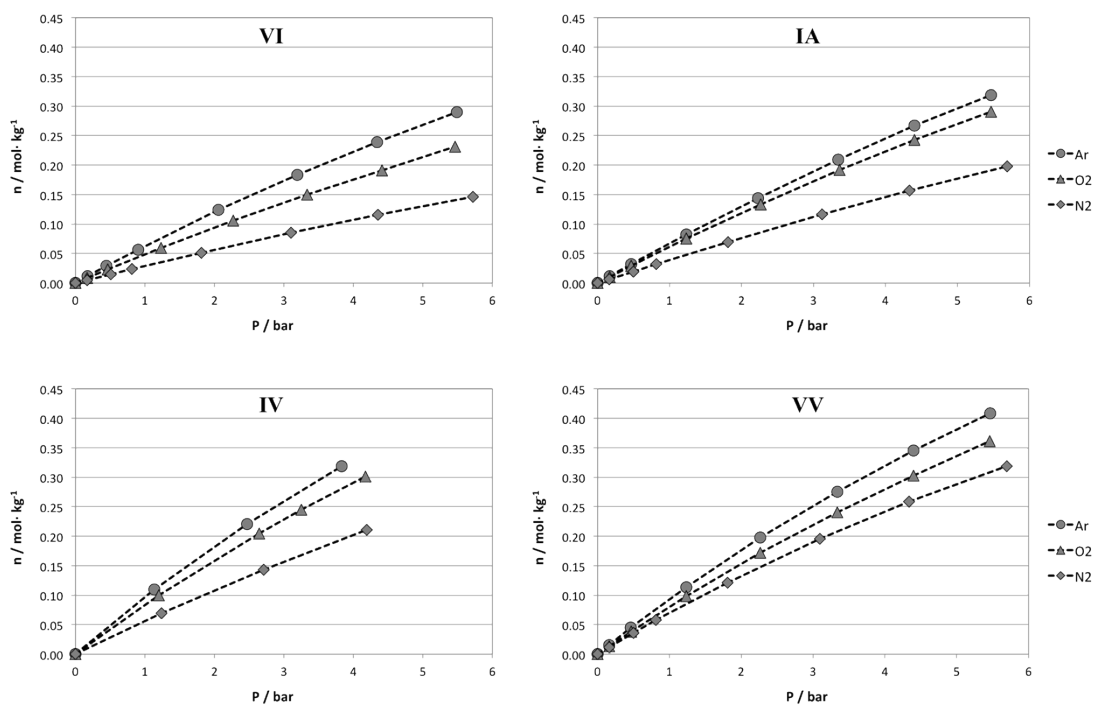

**Figure S1.** Excess adsorption isotherms of Ar, O<sub>2</sub> and N<sub>2</sub> on VI, IA, IV and VV, at 5 °C, grouped per material.

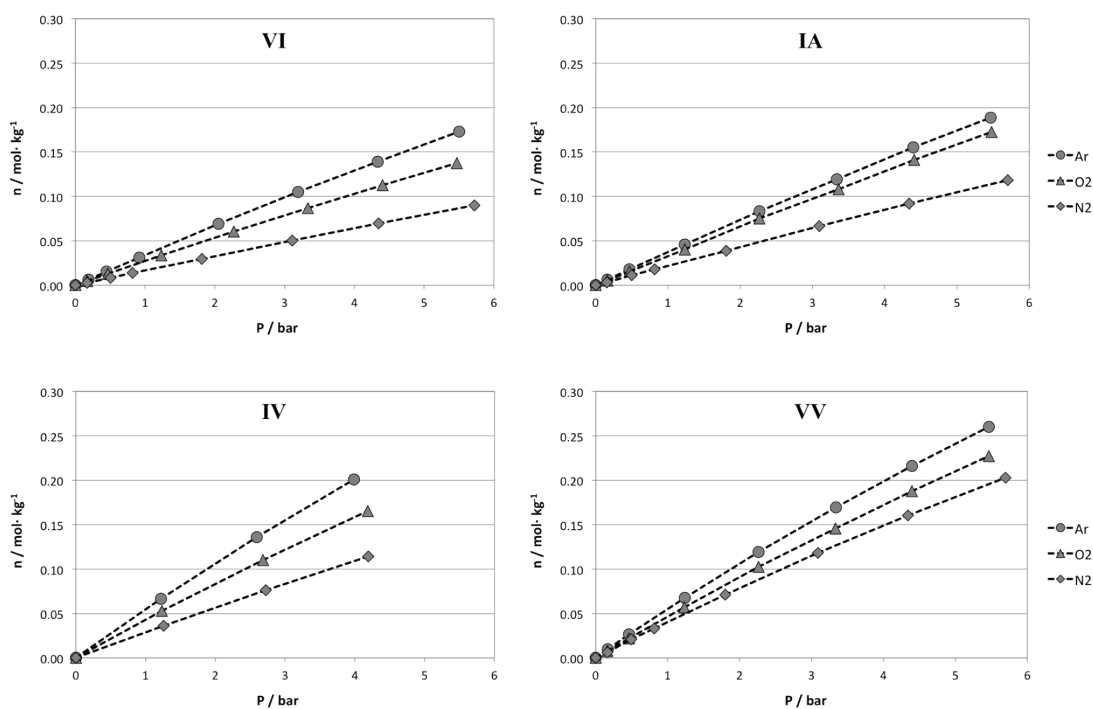

**Figure S2.** Excess adsorption isotherms of Ar, O<sub>2</sub> and N<sub>2</sub> on VI, IA, IV and VV, at 35 °C, grouped per material.

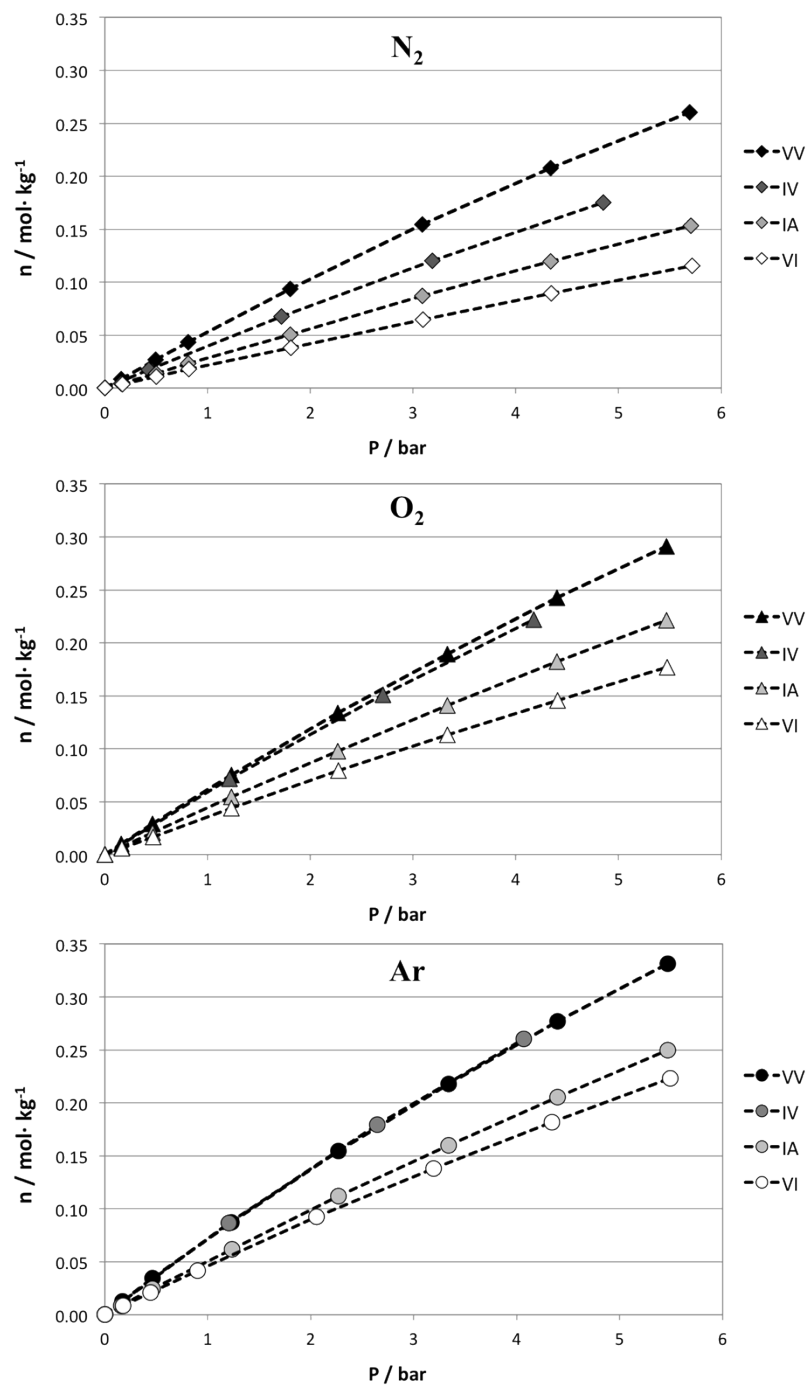

**Figure S3.** Excess adsorption isotherms of Ar, O<sub>2</sub> and N<sub>2</sub> on VI, IA, IV and VV, at 20 °C, grouped per gas.



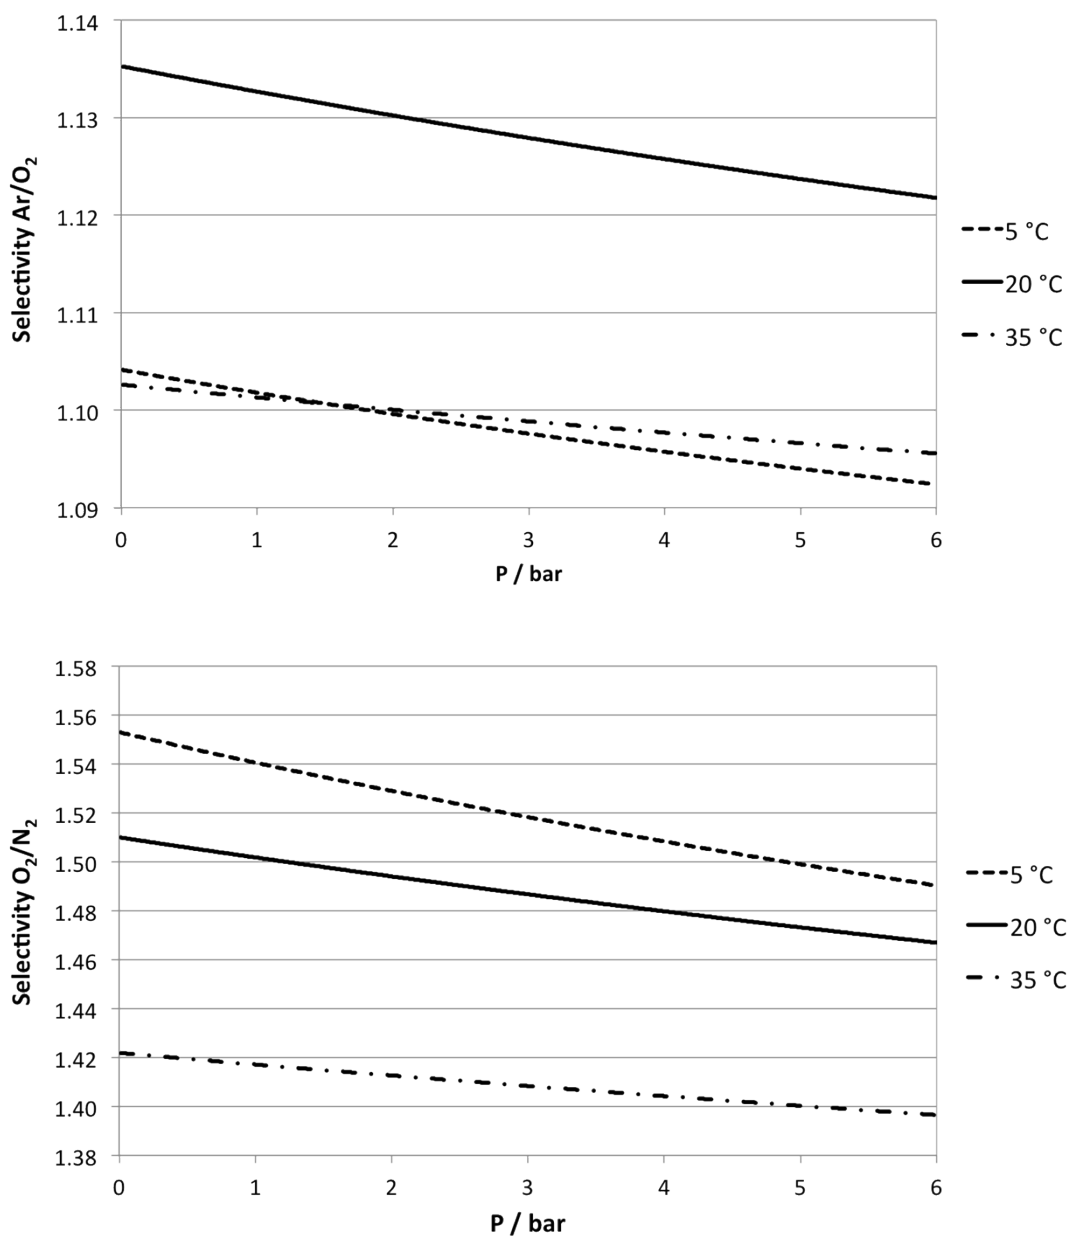

**Figure S4.** Variation of Ar/O<sub>2</sub> and O<sub>2</sub>/N<sub>2</sub> selectivities with pressure, for IA, at 5 °C, 20 °C and 35 °C.

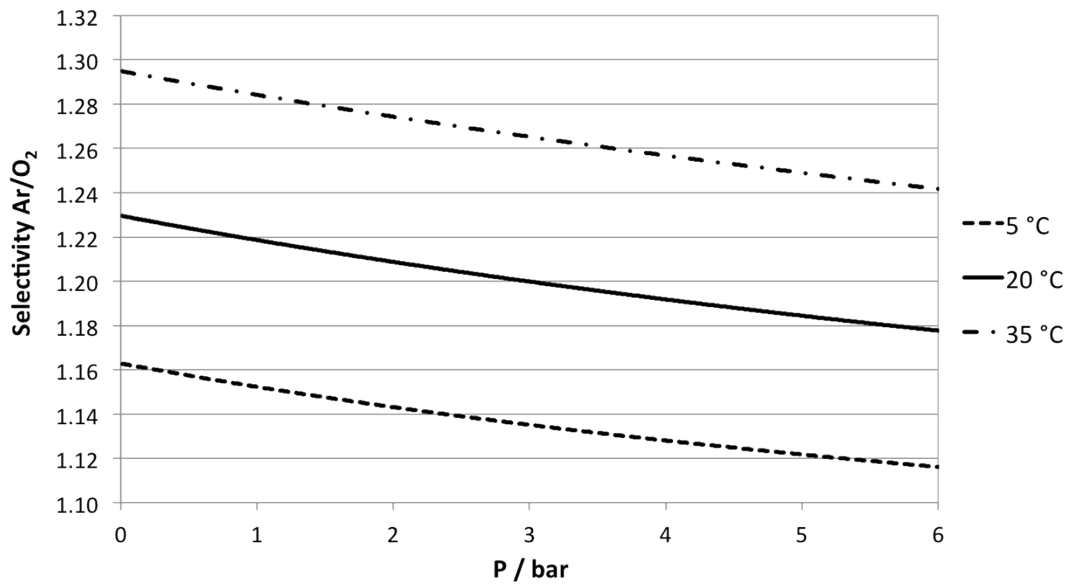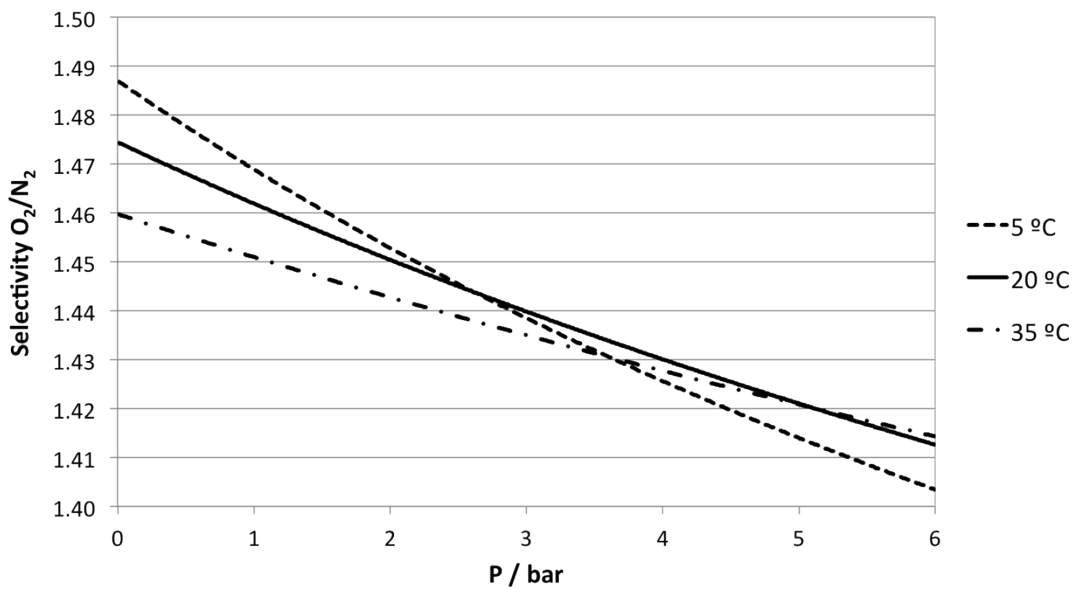

**Figure S5.** Variation of Ar/O<sub>2</sub> and O<sub>2</sub>/N<sub>2</sub> selectivities with pressure, for IV, at 5 °C, 20 °C and 35 °C.

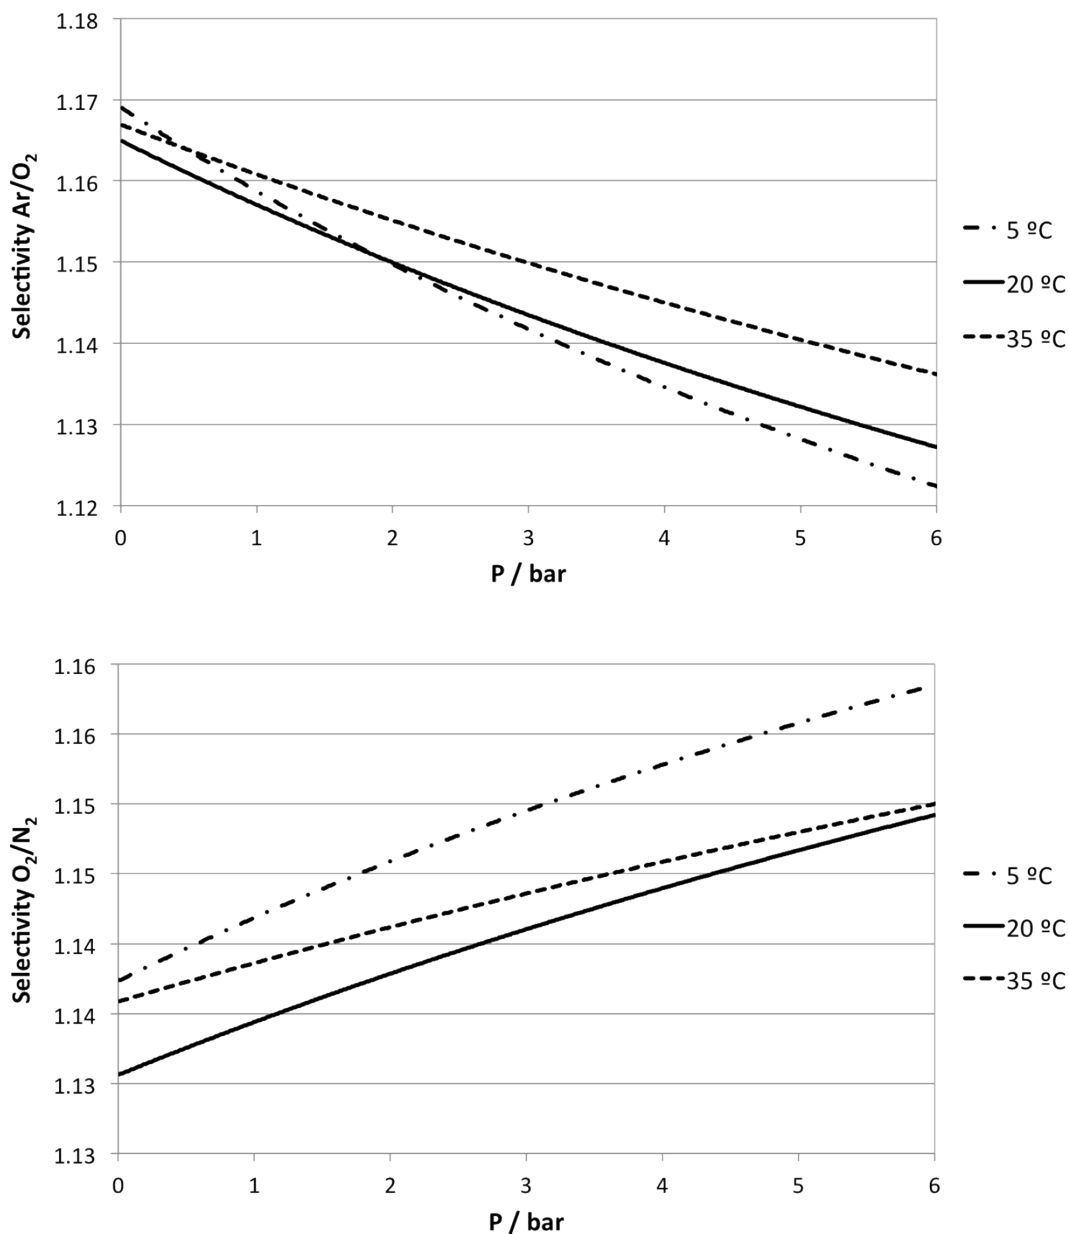

**Figure S6.** Variation of Ar/O<sub>2</sub> and O<sub>2</sub>/N<sub>2</sub> selectivities with pressure, for VV, at 5 °C, 20 °C and 35 °C.

## Bibliography

- [1] D.V. Soldatov, I.L. Moudrakovski, E.V. Grachev, J.A. Ripmeester, Micropores in Crystalline Dipeptides as Seen from the Crystal Structure, He Pycnometry, and <sup>129</sup>Xe NMR Spectroscopy, *J. Am. Chem. Soc.*, 128 (2006) 6737-6744.
